# Supplementary material for: Pregnancies and Gynecological Follow-Up after Solid Organ Transplantation: Experience of a Decade
Source: MDPI journal article supplement (doi:10.3390/jcm11164792), 2022-08-16
Supplement: s1 [file s1]

**Table S1.** Demographic characteristics of patients according to pregnancy status post-transplantation

|                                              | <b>Patients with <math>\geq 1</math> pregnancy<br/>(n=24)</b> | <b>No pregnancy patients<br/>(n=186)</b> | <b>p value</b> |
|----------------------------------------------|---------------------------------------------------------------|------------------------------------------|----------------|
| Age at SOT, years                            | 29.3 <sup>1</sup> $\pm$ 5                                     | 29.2 $\pm$ 6.1                           | 0.939          |
| BMI at SOT, kg/m <sup>2</sup>                | 19.8 $\pm$ 5.7 (n=17)                                         | 20.2 $\pm$ 4.5 (n=168)                   | 0.734          |
| Organ transplanted                           |                                                               |                                          |                |
| Kidney                                       | 15 <sup>2</sup> (62.5%)                                       | 81 (43.5%)                               | 0.079          |
| Lung                                         | 9 (37.5%)                                                     | 105 (56.5%)                              |                |
| History of                                   |                                                               |                                          |                |
| Hypertension                                 | 12 (50.0%)                                                    | 59 (31.7%)                               | 0.074          |
| Diabetes mellitus                            | 4 (16.7%)                                                     | 70 (37.6%)                               | 0.067          |
| Gyn. cancer                                  | 1 (4.2%)                                                      | 1 (0.5%)                                 | 0.216          |
| Gravidity (G)                                |                                                               |                                          |                |
| G0                                           | 17 (70.8%)                                                    | 116 (62.4%)                              | 0.417          |
| $\geq$ G1                                    | 7 (29.2%)                                                     | 70 (37.6%)                               |                |
| Parity (P)                                   |                                                               |                                          |                |
| P0                                           | 17 (70.8%)                                                    | 130 (69.9%)                              | 0.925          |
| $\geq$ P1                                    | 7 (29.2%)                                                     | 56 (30.1%)                               |                |
| History of preeclampsia<br>(of n: $\geq$ P1) | n=4<br>2 (50.0%)                                              | n=25<br>10 (40.0%)                       | 1.000          |

<sup>1</sup> Values are mean  $\pm$  SD<sup>2</sup> Values in parentheses are the percentages of the number of patients in each transplantation group unless otherwise indicated.

BMI: body mass index, Gyn.: gynecologic.
