# Supplementary material for: Pregnancies and Gynecological Follow-Up after Solid Organ Transplantation: Experience of a Decade
Source: MDPI journal article supplement (doi:10.3390/jcm11164792), 2022-08-16
Supplement: s1 [file s1]

**Table S2.** Medical characteristics of patients according to pregnancy status post-transplantation

|                                               | <b>Patients with <math>\geq 1</math> pregnancy<br/>(n=24)</b> | <b>No pregnancy patients<br/>(n=186)</b> | <b>p value</b> |
|-----------------------------------------------|---------------------------------------------------------------|------------------------------------------|----------------|
| <b>Etiology</b>                               |                                                               |                                          |                |
| <b>Lung:</b>                                  | <i>n=9</i>                                                    | <i>n=105</i>                             |                |
| CF                                            | 9 <sup>1</sup> (100%)                                         | 95 (90.5%)                               | 1.000          |
| PCD                                           | 0                                                             | 1 (0.9%)                                 | 1.000          |
| Bronch.                                       | 0                                                             | 4 (3.8%)                                 | 1.000          |
| Fibrosis                                      | 0                                                             | 3 (2.9%)                                 | 1.000          |
| Other <sup>2</sup>                            | 0                                                             | 2 (1.9%)                                 | 1.000          |
| <b>Kidney:</b>                                | <i>n=15</i>                                                   | <i>n=81</i>                              |                |
| Diabetes                                      | 0                                                             | 13 (16.0%)                               | 0.210          |
| Glom.                                         | 5 (33.3%)                                                     | 20 (24.7%)                               | 0.527          |
| Vasc.                                         | 1 (6.7%)                                                      | 4 (4.9%)                                 | 0.580          |
| PKD                                           | 0                                                             | 5 (6.2%)                                 | 1.000          |
| Interst.                                      | 2 (13.3%)                                                     | 4 (4.9%)                                 | 0.235          |
| Unknown                                       | 3 (20.0%)                                                     | 16 (19.8%)                               | 1.000          |
| Other <sup>3</sup>                            | 4 (26.7%)                                                     | 19 (23.5%)                               | 0.751          |
| Multi-SOT                                     | 0                                                             | 18 (9.7%)                                | 0.235          |
| GFR <sup>4</sup> (ml/min/1.73m <sup>2</sup> ) | <i>n = 15</i>                                                 | <i>n=81</i>                              |                |
| 1 year after SOT                              | 68 <sup>5</sup> $\pm$ 22 ( <i>n=10</i> )                      | 59 $\pm$ 24 ( <i>n=73</i> )              | 0.353          |
| 2 years after SOT                             | 69 $\pm$ 16 ( <i>n=10</i> )                                   | 56 $\pm$ 24 ( <i>n=62</i> )              | 0.199          |
| FEV1 <sup>6</sup> (%)                         | <i>n = 9</i>                                                  | <i>n=105</i>                             |                |
| 1 year after SOT                              | 87.6 $\pm$ 19.2                                               | 80.6 $\pm$ 17.5                          | 0.256          |
| 2 years after SOT                             | 86.7 $\pm$ 21.3                                               | 82 $\pm$ 18 ( <i>n=103</i> )             | 0.458          |

<sup>1</sup> Values in parentheses are the percentages of the number of patients in each transplantation group unless otherwise indicated.

<sup>2</sup> Includes emphysema, bronchiolitis

<sup>3</sup> Includes urological malformation, side effects of use of calcineurin inhibitors, systemic lupus erythematosus, scleroderma, Alagille syndrome, acute tubular necrosis, tuberous sclerosis complex, hemolytic uremic syndrome, bilateral persistent obstruction, hyperoxaluria

<sup>4</sup> Normal GFR is  $\geq 90$  ml/min/1.73m<sup>2</sup> for a young woman, eGFR : estimated according to CKD EPI equation.

<sup>5</sup> Values are mean  $\pm$  SD

<sup>6</sup> Lower limit of normal FEV1 is 80% in the general population. Pregnancies were usually prohibited for women if the FEV1 was under 40%.

CF: cystic fibrosis, PCD: primary ciliary dyskinesia, bronch.: bronchiectasis, glom.: glomerulopathy, vasc.: microvascular condition for hypertension, PKD: polycystic kidney disease, interst.: interstitial kidney disease
